# Supplementary material for: Clinical applicability of miR517a detection in liquid biopsies of ETMR patients
Source: Springer Nature journal article supplement (doi:10.1007/s00401-023-02567-z), 2023-04-05
Supplement: MOESM1 [file 25211518]

# Clinical applicability of miR517a detection in liquid biopsies of ETMR patients

Madlener et al.

Online supplementary material

Supplementary Figures 1-3

Supplementary Tables 1-3

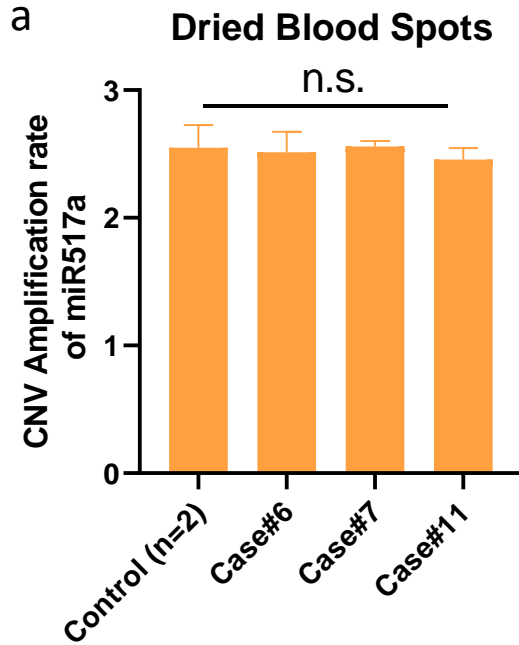

Supplementary Fig. 1: a) Copy number variation of miR517a in dried blood spots. The amplification cut off was set to 2.5 b) Scatter plot of ddPCR, blue is representing positive droplets for miR517a, orange are double positive droplets including reference gene (MDM4) and miR517a, green are positive droplets for the reference gene and grey droplets were negative (no DNA detected). The amplification rate was calculated as followed:

$$\text{Amplification rate} = \left( \frac{\text{Copies gene of interest}}{\text{Copies of reference gene}} \right) \times 2$$

**b**

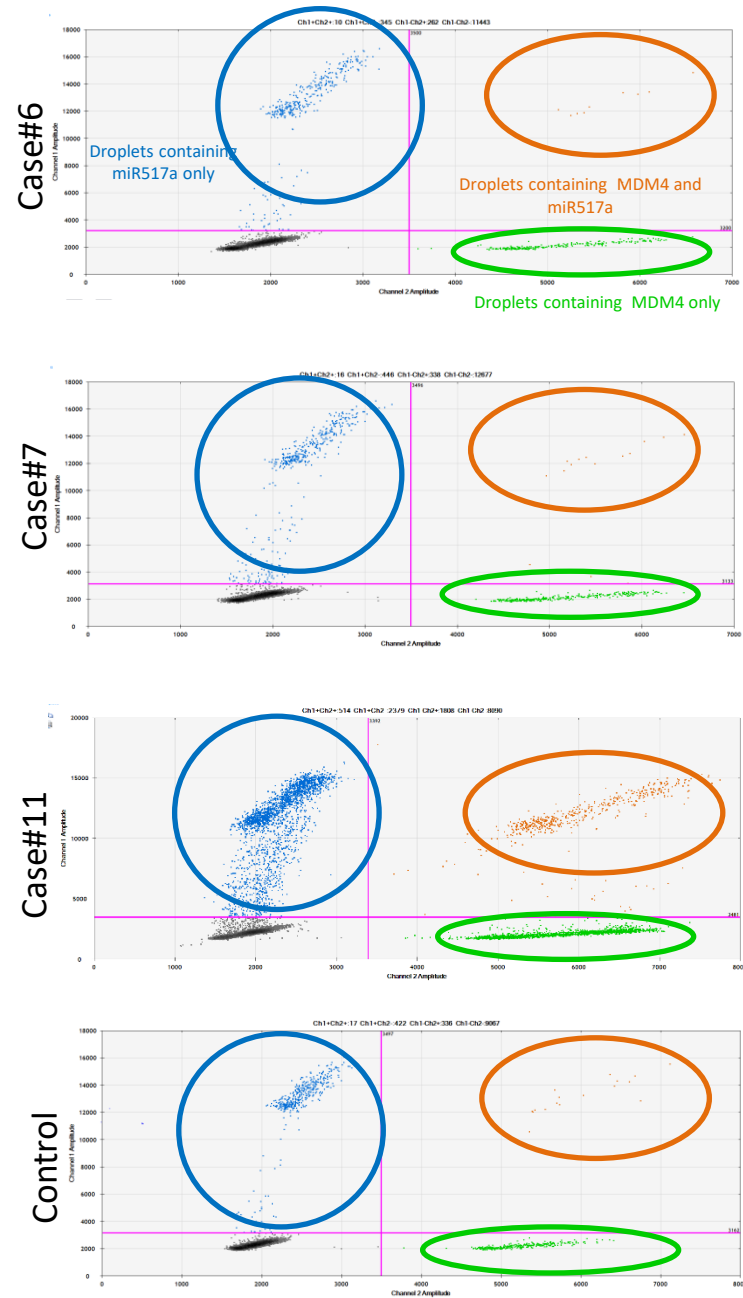

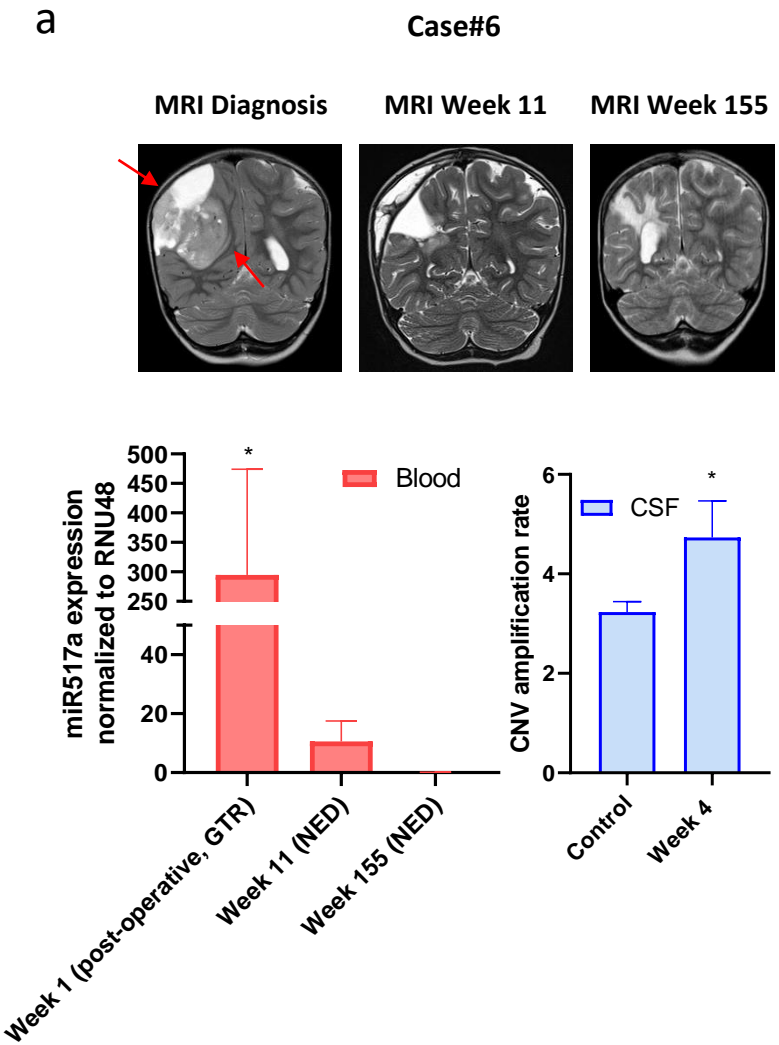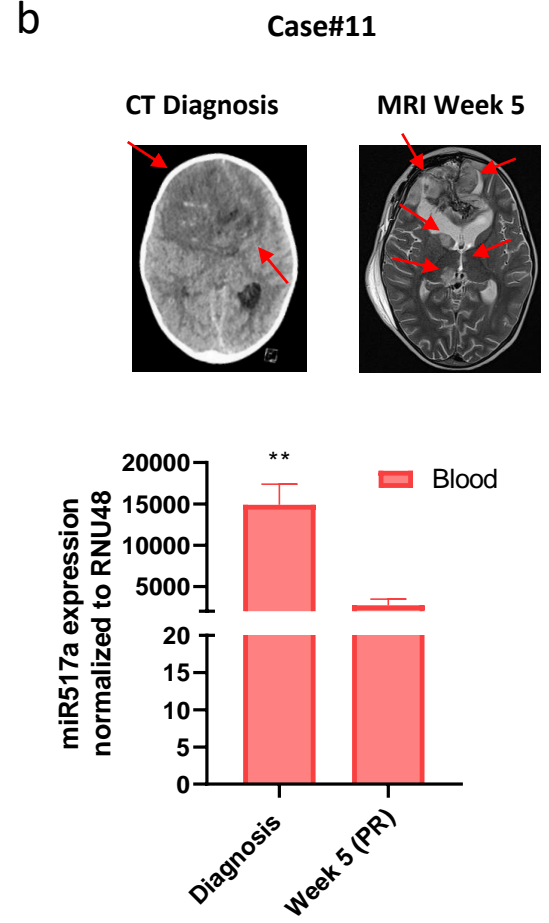

Supplementary Figure 2: Liquid biopsy detection of miRNA enables therapy monitoring in ETMR patients. ETMR cases and matched MRI images (FLAIR, upper panel) as well as longitudinal monitoring of miR517a expression in serum and CNV in CSF for a) case#6 and plasma for b) case#11.

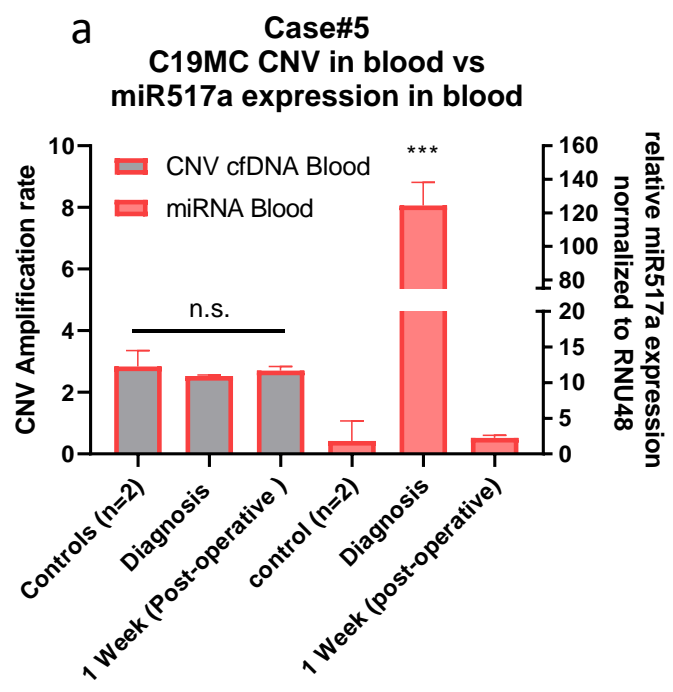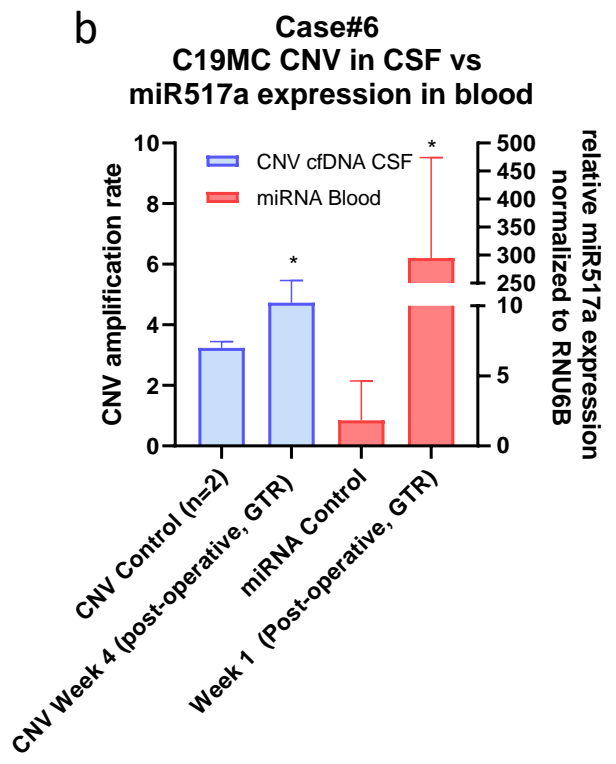

Supplementary Fig. 3: a) Detection of CNV in blood and CSF. Amplification cut off was set to 2.5. a) Case#5 CNV vs miRNA expression in blood. b) case#6 CNV of C19MC cluster in CSF vs miR517a expression in blood.

## Supplementary Table 1

Detailed information on isolated blood source of patient

| Case    | Blood source | Isolated volume | Isolated RNA source | Sample quantity |
|---------|--------------|-----------------|---------------------|-----------------|
| Case#5  | Serum        | 200μl           | Small RNAs          | 2               |
| Case#6  | Serum        | 200μl           | Small RNAs          | 3               |
| Case#7  | Plasma       | 200μl           | Small RNAs          | 4               |
| Case#9  | Plasma       | 200μl           | Small RNAs          | 3               |
| Case#11 | Plasma       | 200μl           | Small RNAs          | 2               |

Supplementary Table 2

Specificity and Sensitivity of miR-517a in different analytes compared to non-tumor controls

|                                 | Liquid biomarker |         |         |             |           |
|---------------------------------|------------------|---------|---------|-------------|-----------|
| Source                          | Plasma           | Serum   | Serum   | CSF         | CSF       |
| Structure                       | miRNA            | miRNA   | cfDNA   | miRNA       | cfDNA     |
| Marker                          | miR517a          | miR517a | miR517a | miR517a     | miR517a   |
| Case                            | 5                | 2       | 1       | 6           | 6         |
| Controls                        | 20               | 20      | 2       | 3           | 5         |
| GEX (fold change)               | 2.5 -17.000      | 4 - 500 | n.a.    | 0.7- 45.000 | n.a.      |
| CNV                             | n.a.             | n.a.    | 2.5     | n.a.        | 2.3 - 5.5 |
| Specificity                     | 100              | 100     | n.a.    | 60          | 80        |
| Sensitivity                     | 100              | 100     | n.a.    | 66.66       | 70        |
| Positive predictive value (PPV) | 100              | 100     | n.a.    | 66.66       | 100       |
| Negative predictive value (NPV) | 100              | 100     | n.a.    | 60          | 71.42     |

### Supplementary Table 3

#### Summary of ETMR cases with liquid biopsy analyses adapted from Mayr et al.:

Mayr L, Gojo J, Peyrl A, Azizi AA, Stepien NM, Pletschko T, et al. *Potential Importance of Early Focal Radiotherapy Following Gross Total Resection for Long-Term Survival in Children With Embryonal Tumors With Multilayered Rosettes*. *Front Oncol*. 2020;10:1–10.

| Case | Age (months) | Gender | Location  | Surgery | M-Stage | Primary CT            | Focal RT<br>(months after Dx) | Intrathecal CT | HDCT | Status/<br>Follow up<br>(months) |
|------|--------------|--------|-----------|---------|---------|-----------------------|-------------------------------|----------------|------|----------------------------------|
| 5    | 16           | f      | pineal    | GTR     | M0      | MUV ATRT              | 6.5                           | yes            | no   | DOD,13                           |
| 6    | 38           | f      | parietal  | GTR     | M0      | PEI/TMZ               | 1.5                           | yes            | no   | NED,87+                          |
| 7    | 27           | f      | bifrontal | GTR     | M0      | PEI/TMZ               | 1.5                           | yes            | no   | NED,82+                          |
| 9    | 19           | m      | pineal    | PR      | M0      | IP-CZD                | 5.5                           | yes            | no   | DOD,14                           |
| 11   | 27           | F      | bifronal  | PR      | M0      | talazoparib/topotecan | no                            | no             | no   | DOD,5                            |

CT, chemotherapy; RT, radiotherapy; Dx, diagnosis; HDCT, high-dose chemotherapy; GTR, gross total resection; PR, partial resection; MUV ATRT, Medical University of Vienna – Atypical teratoid rhabdoid tumor protocol (Slavc et al., *Cancer Medicine* 2014); PEI, cisplatin-etoposide-ifosfamide; TMZ, temozolomide; IP-CZD, polish infant IP-CZD protocol; DOD, death of disease; NED, no evidence of disease
